# Supplementary material for: Anthocyanins Profiling Analysis and RNA-Seq Revealed the Dominating Pigments and Coloring Mechanism in Cyclamen Flowers
Source: MDPI journal article supplement (doi:10.3390/biology11121721), 2022-11-28
Supplement: s1 [file s1]

### Supplementary Material

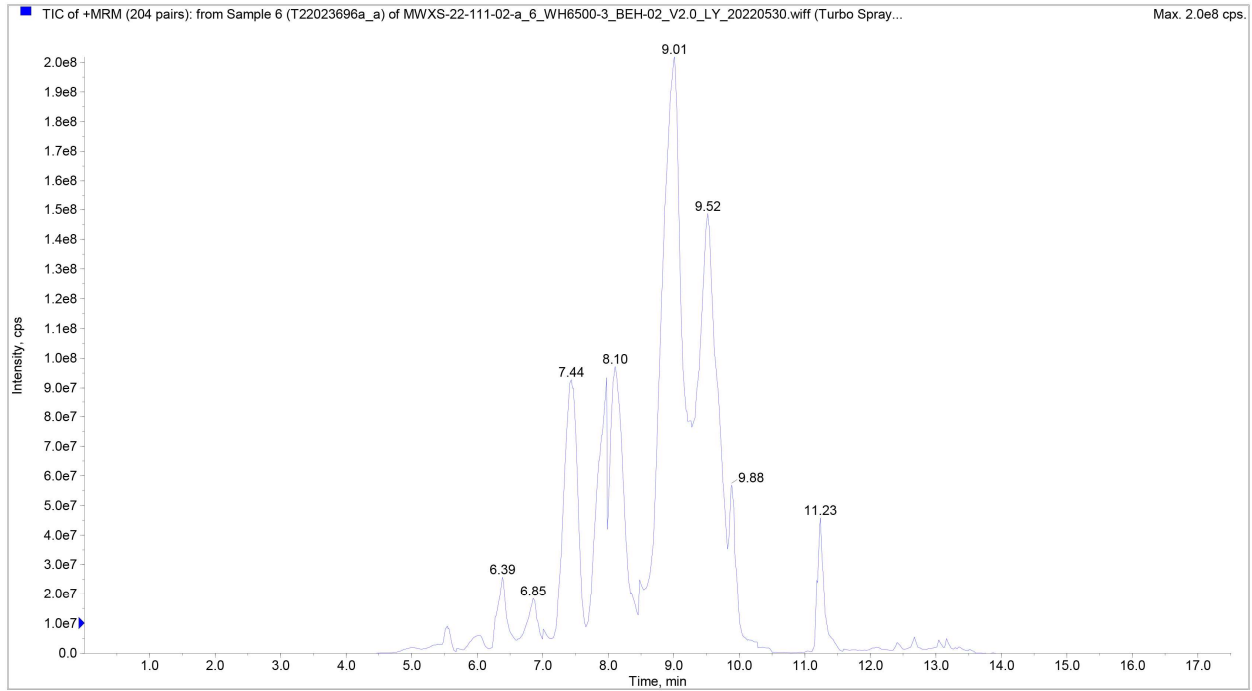

Figure S1: HPLC chromatogram of anthocyanin identified from *C. purpurascens* flower (BXK1).

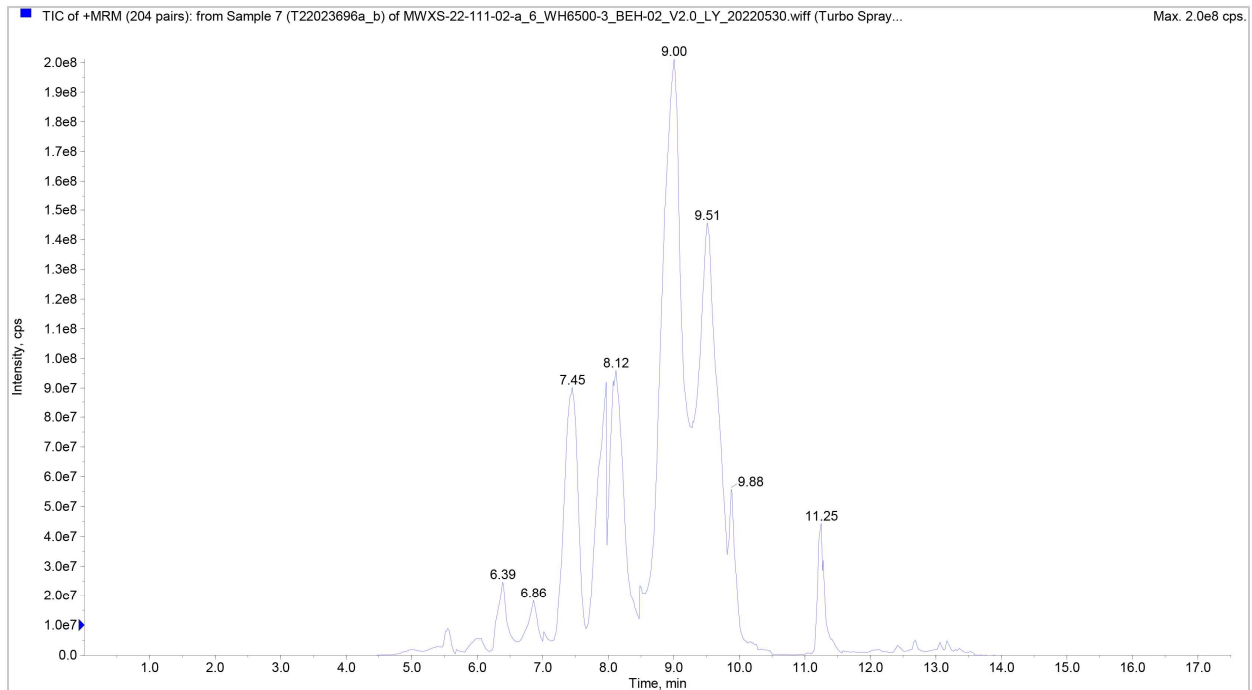

Figure S2: HPLC chromatogram of anthocyanin identified from *C. purpurascens* flower (BXK2).

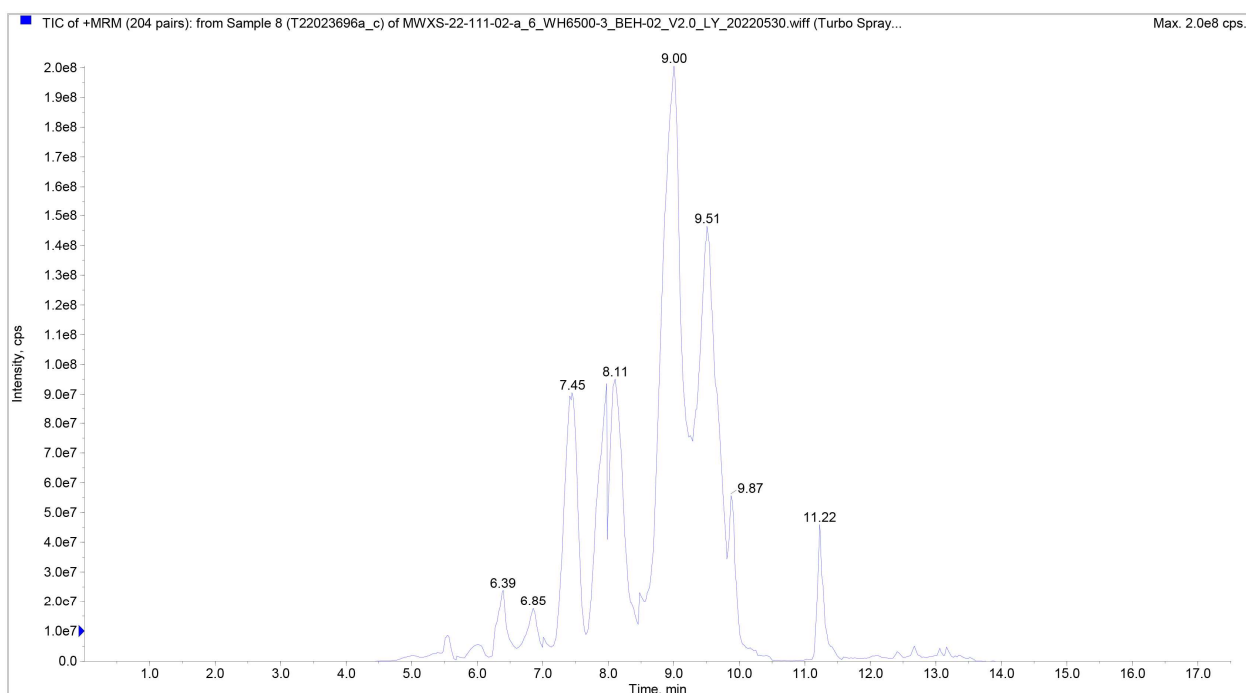

Figure S3: HPLC chromatogram of anthocyanin identified from *C. purpurascens* flower (BXK3).

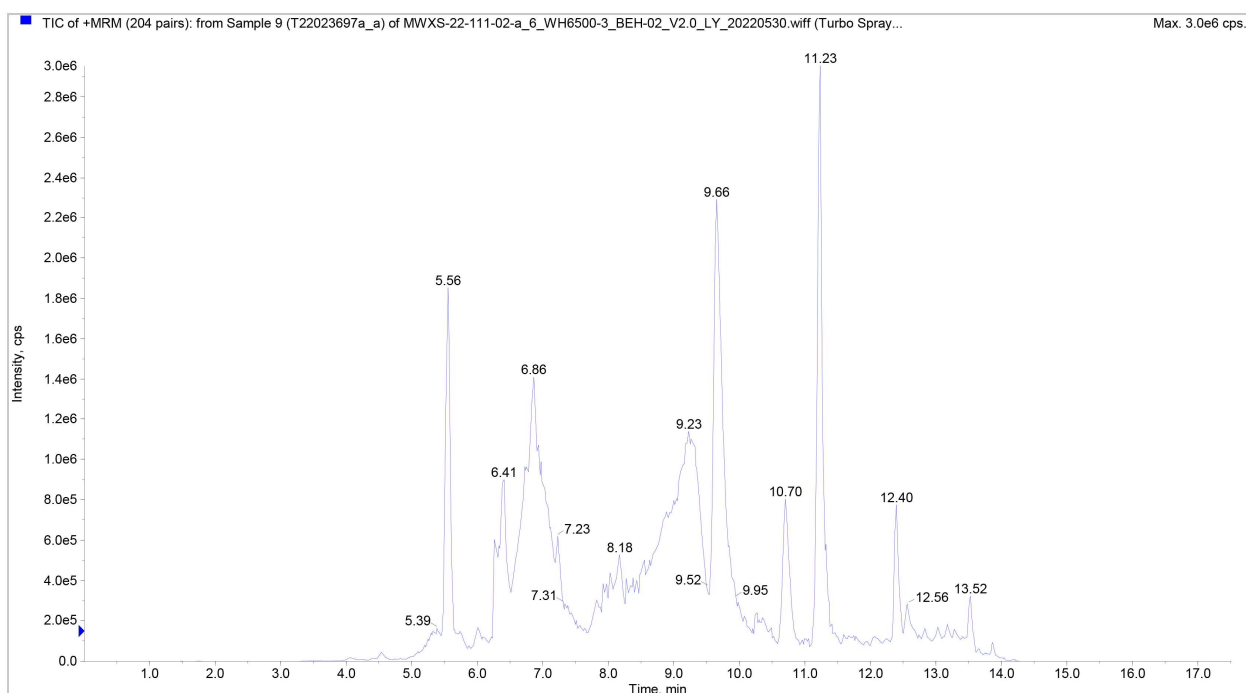

Figure S4: HPLC chromatogram of anthocyanin identified from *C. purpurascens* flower (HXX1).

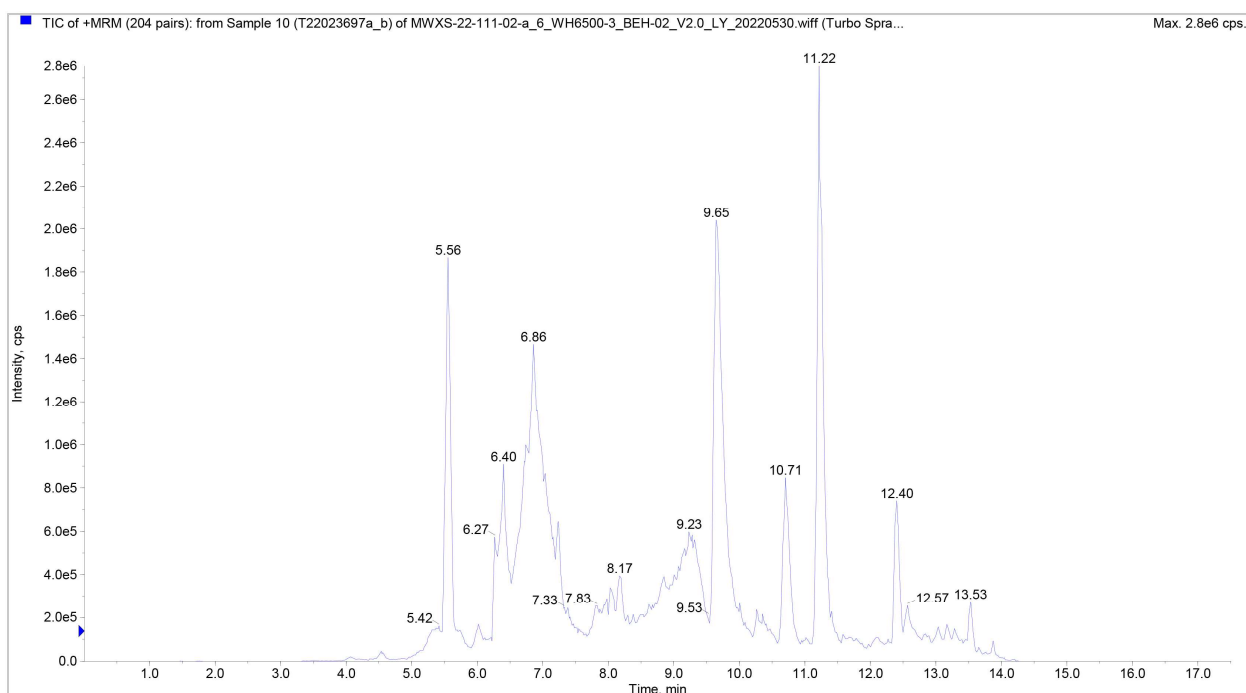

Figure S5: HPLC chromatogram of anthocyanin identified from *C. purpurascens* flower (HXK2).

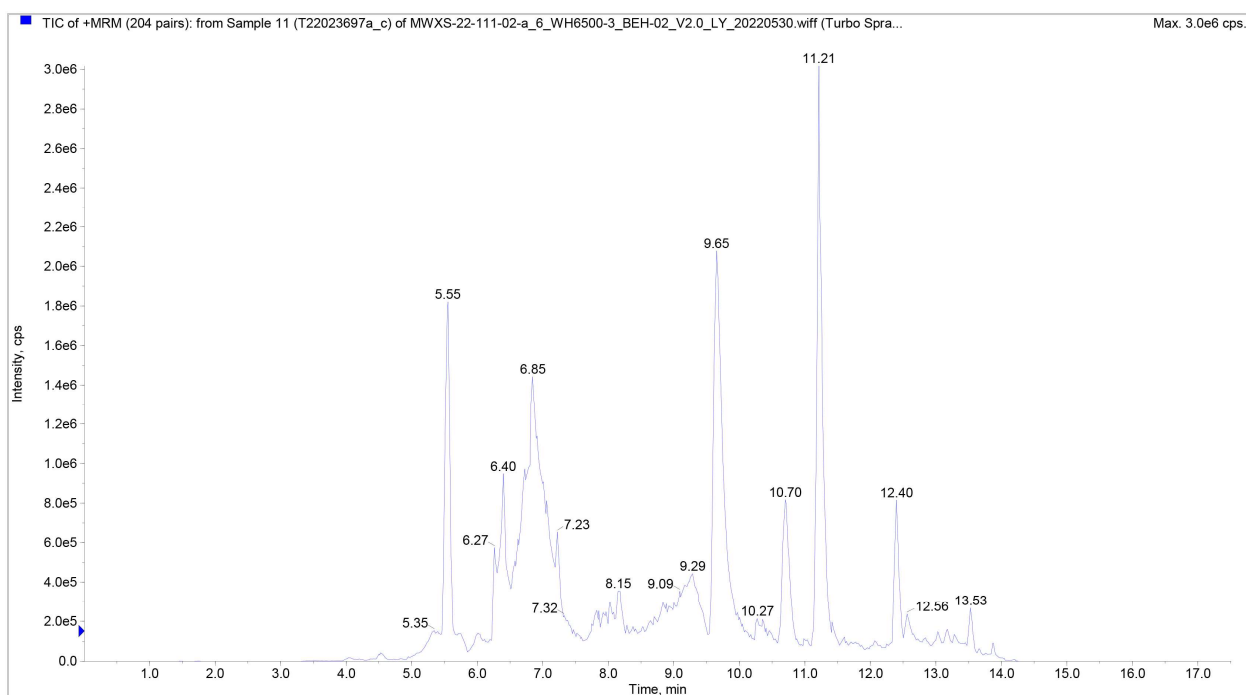

Figure S6: HPLC chromatogram of anthocyanin identified from *C. purpurascens* flower (HXK3).

**Supplementary Table S1. Primers used in quantitative RT-PCR analysis**

| Gene ID       | Sequence of 5' primer | Sequence of 3' primer |
|---------------|-----------------------|-----------------------|
| g1022_i0      | TGGGGAAATTCATCCACATT  | CACATTTTGGCTTCATGTGC  |
| g10365_i0     | GGCAATTCATGTTGCCTCTT  | CGGGAGGTACAGTCAGGTGT  |
| g10266_i0     | CCTGCTGCTGAATGATTTTG  | ATTACCCATCCCACCACAAC  |
| g10340_i0     | GAATGCAGGGCCATTGTACT  | TGGTCCGTCTCCAGAATAC   |
| g10589_i0     | TGATCGAGACCCGAAAAATC  | TCAGCCGTCCATTCTTCTCT  |
| g11358_i0     | ACCCGAAAAGCAGAGTAGCA  | TGCTGTCTTGTCTCGTTTG   |
| g34436_i0     | AGCTGTTGTCGTTTCATGCTG | TTTTGTCTCGAACCCAGACC  |
| g18620_i0     | CTCCGTGGTGGATTCTGATT  | TTGGGCAAACCAACACATAA  |
| g526_i0       | GGTAACTCGGGACAAAGCA   | ACATTGCCACATCAACCTCA  |
| eEF1 $\alpha$ | CTGGTGGTTTTGAGGCTGG   | CTGGCCAGGGTGGTTCATGAT |
| g5626_i0      | GGTCGGAGTGTTTGAGCAAT  | ATGGACGCTTGAACAAAACC  |
| g8206_i0      | GGTCGGAGTGTTTGAGCAAT  | ATGGACGCTTGAACAAAACC  |

**Supplementary Table S2. The candidate TFs involved in anthocyanin accumulation.**

| Transcription factor | Gene ID   | Annotation                       | Up or Down-regulated TFs in BXK-VS-HXK |
|----------------------|-----------|----------------------------------|----------------------------------------|
| SRF                  | g31608_i0 | MADS-domain transcription factor | up                                     |
|                      | g27602_i0 | MADS-domain transcription factor | up                                     |
|                      | g23754_i0 | like MADS-box protein AGL8       | up                                     |
|                      | g19111_i0 | like MADS-box protein AGL15      | up                                     |
|                      | g26811_i0 | like MADS-box protein AGL12      | up                                     |
|                      | g28187_i0 | MADS-domain transcription factor | up                                     |

|          |           |                                                              |    |
|----------|-----------|--------------------------------------------------------------|----|
|          | g20026_i0 | like MADS-box protein AGL66                                  | up |
| MYB      | g25403_i0 | flavonoid-related R2R3 MYB 4a repressor transcription factor | up |
|          | g6939_i0  | Myb-related protein 3R-3                                     | up |
|          | g21772_i0 | Myb-related protein 306                                      | up |
|          | g10657_i0 | Myb-related protein 3R-3                                     | up |
|          | g27153_i0 | Myb-related protein 73                                       | up |
|          | g6484_i0  | Myb-related protein 3R-5                                     | up |
|          | g20876_i0 | Myb-related protein 102                                      | up |
|          | g32204_i0 | Myb-related protein 77                                       | up |
|          | g29503_i0 | Atypical R2R3-MYB transcription factor CDC5                  | up |
|          | g25712_i0 | Myb-related protein 308                                      | up |
|          | g30397_i0 | Myb-related protein 73                                       | up |
|          | g18595_i0 | Myb-related protein MYB3R-2                                  | up |
|          | g18251_i0 | Myb-related protein 41                                       | up |
|          | g21878_i0 | Myb-related protein 3R-3                                     | up |
| MBD      | g15098_i0 | Histone H3-K9 methyltransferase 4                            | up |
|          | g7947_i0  | C2H2 zinc finger-SET histone methyltransferase               | up |
| Homeobox | g7677_i0  | like homeodomain protein                                     | up |
|          | g25065_i0 | homeobox-leucine zipper protein HAT5-like                    | up |
|          | g11677_i0 | like homeodomain protein                                     | up |
|          | g7543_i0  | like homeodomain protein                                     | up |
|          | g14735_i0 | Homeobox protein knotted-1-like 3                            | up |
|          | g21714_i0 | Homeobox protein HOS16                                       | up |

|           |           |                                                          |      |
|-----------|-----------|----------------------------------------------------------|------|
|           | g26153_i0 | Homeodomain transcription factor ATHB-13                 | up   |
|           | g12891_i0 | like homeodomain protein                                 | up   |
| CSD       | g23776_i0 | Cold shock domain-containing protein 3                   | up   |
| TF_others | g33674_i0 | Thymocyte nuclear protein 1                              | up   |
|           | g31650_i0 | Protein MHF1 homolog                                     | up   |
|           | g42606_i0 | Histone H3.1                                             | up   |
| SRF       | g33460_i0 | like MADS-box protein AGL2                               | down |
|           | g26358_i0 | MADS-box transcription factor                            | down |
| C2H2      | g2452_i0  | Probable protein arginine N-methyltransferase 3          | down |
| MYB       | g2206_i0  | transcription factor R2R3-MYB1                           | down |
|           | g33866_i0 | MYB family transcription factor                          | down |
|           | g8716_i0  | transcription factor R2R3-MYB1                           | down |
|           | g5782_i0  | MYB family transcription factor                          | down |
|           | g27919_i0 | Myb-related protein 66                                   | down |
|           | g19104_i0 | Myb-related protein 61                                   | down |
|           | g34207_i0 | Myb-related protein 23                                   | down |
|           | g30143_i0 | MYB-like protein                                         | down |
|           | g17765_i0 | MYB-like protein                                         | down |
|           | g36054_i0 | transcription factor R2R3-MYB1                           | down |
| MBD       | g7186_i0  | Histone-lysine N-methyltransferase SUVR4                 | down |
|           | g5449_i0  | Histone-lysine N-methyltransferase family member protein | down |
|           | g8491_i0  | Histone H3-K9 methyltransferase 4                        | down |
| HSF       | g11233_i0 | Heat stress transcription factor B-2a                    | down |

|           |           |                                                      |      |
|-----------|-----------|------------------------------------------------------|------|
|           | g2691_i0  | hypothetical protein TanjilG_28154                   | down |
|           | g13489_i0 | Heat shock transcription factor 30                   | down |
|           | g11233_i0 | Heat stress transcription factor B-2a                | down |
| Homeobox  | g22517_i0 | Homeobox protein like                                | down |
|           | g11440_i0 | BEL1-like homeodomain protein 2                      | down |
| HMG       | g5303_i0  | WD repeat and HMG-box DNA-binding protein like       | down |
|           | g31522_i0 | HMG1/2-like protein                                  | down |
|           | g5082_i0  | Histone-lysine N-methyltransferase                   | down |
| E2F       | g14734_i0 | E2F transcription factor-3v                          | down |
|           | g16173_i0 | Transcription factor E2FC                            | down |
| TF_others | g20707_i0 | Prohibitin-1 like                                    | down |
|           | g24930_i0 | NAC transcription factor 037                         | down |
|           | g19760_i0 | ethylene-responsive transcription factor ERF014-like | down |
|           | g36811_i0 | transcription factor TCP4-like                       | down |
|           | g32312_i0 | ethylene-responsive transcription factor ERF014-like | down |
|           | g2629_i0  | Chloroplastic small ribosomal subunit protein cS22   | down |
|           | g22909_i0 | Bromodomain and PHD finger-containing protein 1      | down |

**Supplementary Table S3. The classification and quantification results of all detected metabolites.**

| Compounds                                        | HXK 1            | HXK 2            | HXK 3            | BXK 1            | BXK 2            | BXK 3            | MWXS22111<br>02a R1 | MWXS22111<br>02a R2 | MWXS22111<br>02a R3 |
|--------------------------------------------------|------------------|------------------|------------------|------------------|------------------|------------------|---------------------|---------------------|---------------------|
| Cyanidin-3,5-O-diglucoside                       | 6.678650<br>14   | 6.701776<br>14   | 6.176733<br>49   | 0.790998<br>071  | 0.954378<br>405  | 0.864535<br>388  | 1.643362            | 1.987148            | 2.0508              |
| Cyanidin-3-O-galactoside                         | N/A                 | N/A                 | N/A                 |
| Cyanidin-3-O-arabinoside                         | N/A                 | N/A                 | N/A                 |
| Cyanidin-3-O-(6-O-p-coumaroyl)-glucoside         | N/A                 | N/A                 | N/A                 |
| Cyanidin-3-O-5-O-(6-O-coumaroyl)-diglucoside     | N/A                 | N/A                 | N/A                 |
| Cyanidin-3,5,3'-O-triglucoside                   | N/A                 | N/A                 | N/A                 |
| Cyanidin-3-(6"-caffeylsophoroside)-5-glucoside   | N/A                 | N/A                 | N/A                 |
| Cyanidin-3-(6-O-p-caffeoyl)-glucoside            | N/A                 | N/A                 | N/A                 |
| Cyanidin-3-O-sambubioside-5-O-glucoside          | 0.209188<br>361  | 0.207948<br>727  | 0.188731<br>844  | N/A              | N/A              | N/A              | 0.0751756           | 0.0774764           | 0.0846462           |
| Cyanidin-3-O-xyloside                            | 0.049792<br>3554 | 0.041905<br>496  | 0.047852<br>7769 | N/A              | N/A              | N/A              | 0.01932018          | 0.01820286          | 0.01874022          |
| Cyanidin-3-O-sambubioside                        | 31.10437<br>33   | 29.64262<br>73   | 29.31843<br>58   | N/A              | N/A              | N/A              | 9.69658             | 9.61404             | 9.64202             |
| Cyanidin-3-O-rutinoside-5-O-glucoside            | 0.590881<br>543  | 0.486890<br>08   | 0.487755<br>504  | N/A              | N/A              | N/A              | 0.167724            | 0.1750132           | 0.1960626           |
| Cyanidin-3-O-rutinoside                          | 188.0516<br>53   | 188.7942<br>36   | 169.8534<br>34   | N/A              | N/A              | N/A              | 74.7308             | 77.1604             | 75.5484             |
| Cyanidin-3-O-(6-O-malonyl-beta-D-glucoside)      | 1.257541<br>32   | 1.169688<br>34   | 1.141774<br>56   | N/A              | N/A              | N/A              | 0.335902            | 0.3447              | 0.349088            |
| Cyanidin-3-O-sophoroside                         | 25.72699<br>72   | 24.19564<br>34   | 23.40857<br>71   | N/A              | N/A              | N/A              | 7.91688             | 7.82374             | 7.96414             |
| Cyanidin-3-O-glucoside                           | 117.5371<br>9    | 112.7211<br>8    | 109.8797<br>24   | N/A              | N/A              | N/A              | 39.982              | 41.069              | 39.7926             |
| Cyanidin-3-O-(6"-ferulylsophoroside)-5-glucoside | N/A                 | N/A                 | N/A                 |
| Delphinidin-3-O-(6-O-acetyl)-glucoside           | N/A                 | N/A                 | N/A                 |
| Delphinidin-3-O-(6-O-p-coumaroyl)-glucoside      | N/A              | N/A              | N/A              | 0.037907<br>0878 | 0.041055<br>7207 | 0.035519<br>5474 | N/A                 | N/A                 | N/A                 |
| Delphinidin-3-O-glucoside                        | 22.23402<br>2    | 20.42081<br>1    | 19.97446<br>6    | 0.125856<br>798  | 0.121228<br>826  | 0.113361<br>579  | 6.6097              | 6.79302             | 7.01426             |
| Delphinidin-3-O-galactoside                      | 0.226448<br>003  | 0.246798<br>257  | 0.243819<br>257  | 0.024500<br>4822 | 0.026636<br>2556 | 0.027047<br>376  | 0.0610562           | 0.07269             | 0.0681126           |
| Delphinidin-3-O-sambubioside                     | 0.099440<br>0826 | 0.089730<br>2279 | 0.086718<br>0414 | N/A              | N/A              | N/A              | 0.0272918           | 0.0317702           | 0.0314032           |
| Delphinidin-3-O-rutinoside                       | 0.131274<br>793  | 0.129386<br>729  | 0.134138<br>679  | N/A              | N/A              | N/A              | 0.0445756           | 0.040671            | 0.0455502           |



|                                                                   |                 |                 |                 |                              |                              |                              |           |           |           |
|-------------------------------------------------------------------|-----------------|-----------------|-----------------|------------------------------|------------------------------|------------------------------|-----------|-----------|-----------|
| Delphinidin-3-O-sophoroside                                       | 0.232196<br>625 | 0.255207<br>775 | 0.240538<br>285 | 0.031160<br>8968<br>0.065106 | 0.029242<br>5458<br>0.061984 | 0.028727<br>6842<br>0.058076 | 0.0623244 | 0.0649376 | 0.0755346 |
| Delphinidin-3,5-O-diglucoside                                     | N/A             | N/A             | N/A             | 5574                         | 6459                         | 0713                         | N/A       | N/A       | N/A       |
| Delphinidin-3-O-(6-O-malonyl-beta-D-glucoside)                    | N/A             | N/A             | N/A             | N/A                          | N/A                          | N/A                          | N/A       | N/A       | N/A       |
| Delphinidin-3-O-rutinoside-5-O-glucoside                          | N/A             | N/A             | N/A             | N/A                          | N/A                          | N/A                          | N/A       | N/A       | N/A       |
| Delphinidin-3-O-rhamnoside                                        | N/A             | N/A             | N/A             | N/A                          | N/A                          | N/A                          | N/A       | N/A       | N/A       |
| Delphinidin                                                       | 0.719614<br>325 | 0.665613<br>271 | 0.684380<br>546 | N/A                          | N/A                          | N/A                          | 0.220138  | 0.21131   | 0.1888878 |
| Delphinidin-3-O-arabinoside                                       | N/A             | N/A             | N/A             | N/A                          | N/A                          | N/A                          | N/A       | N/A       | N/A       |
| Delphinidin-3-O-5-O-(6-O-coumaroyl)-diglucoside                   | N/A             | N/A             | N/A             | N/A                          | N/A                          | N/A                          | N/A       | N/A       | N/A       |
| Delphinidin-3-O-(6-O-malonyl)-glucoside-3'-glucoside              | N/A             | N/A             | N/A             | N/A                          | N/A                          | N/A                          | N/A       | N/A       | N/A       |
| Delphinidin-3-O-sambubioside-5-O-glucoside                        | N/A             | N/A             | N/A             | N/A                          | N/A                          | N/A                          | N/A       | N/A       | N/A       |
| Malvidin                                                          | N/A             | N/A             | N/A             | N/A                          | N/A                          | N/A                          | N/A       | N/A       | N/A       |
| Malvidin-3-O-(6"-acetylglucoside)-5-glucoside                     | N/A             | N/A             | N/A             | N/A                          | N/A                          | N/A                          | N/A       | N/A       | N/A       |
| Malvidin-3-O-(6-O-malonyl-beta-D-glucoside)                       | 53.95385<br>67  | 50.78317<br>69  | 49.96483<br>73  | 0.169021<br>697              | 0.165303<br>616              | 0.169188<br>734              | 15.2102   | 15.4685   | 15.67814  |
| Malvidin-3-O-rutinoside                                           | N/A             | N/A             | N/A             | N/A                          | N/A                          | N/A                          | N/A       | N/A       | N/A       |
| Malvidin-3-O-sambubioside                                         | N/A             | N/A             | N/A             | N/A                          | N/A                          | N/A                          | N/A       | N/A       | N/A       |
| Malvidin-3-O-sophoroside                                          | N/A             | N/A             | N/A             | N/A                          | N/A                          | N/A                          | N/A       | N/A       | N/A       |
| Malvidin-3-O-galactoside                                          | 68.52100<br>55  | 63.63572<br>39  | 65.11896<br>16  | N/A                          | N/A                          | N/A                          | N/A       | N/A       | N/A       |
| Malvidin-3-O-5-O-(6-O-coumaroyl)-diglucoside                      | N/A             | N/A             | N/A             | N/A                          | N/A                          | N/A                          | N/A       | N/A       | N/A       |
| Malvidin-3-O-sambubioside-5-O-glucoside                           | N/A             | N/A             | N/A             | N/A                          | N/A                          | N/A                          | N/A       | N/A       | N/A       |
| Malvidin-3,5-O-diglucoside                                        | 33.92210<br>74  | 31.86146<br>11  | 32.33125<br>21  | 16.16494<br>7                | 17.98127<br>79               | 17.30491<br>09               | 12.23248  | 12.71612  | 13.61676  |
| Malvidin-3-O-(6-O-p-coumaroyl)-glucoside                          | 0.308038<br>567 | 0.301802<br>949 | 0.292189<br>287 | N/A                          | N/A                          | N/A                          | 0.1001608 | 0.0948152 | 0.1052462 |
| Malvidin-3-O-glucoside                                            | 2969.142<br>56  | 2746.501<br>34  | 2602.559<br>97  | N/A                          | N/A                          | N/A                          | 912.488   | 911.204   | 932.678   |
| Malvidin-3-O-arabinoside                                          | 0.329269<br>284 | 0.293451<br>072 | 0.308155<br>11  | N/A                          | N/A                          | N/A                          | 0.083391  | 0.0841298 | 0.0958266 |
| Pelargonidin-3-O-(6"-ferulylsambubioside)-5-O-(malonyl)-glucoside | N/A             | N/A             | N/A             | N/A                          | N/A                          | N/A                          | N/A       | N/A       | N/A       |
| Pelargonidin-3-O-sambubioside-5-O-glucoside                       | N/A             | N/A             | N/A             | N/A                          | N/A                          | N/A                          | N/A       | N/A       | N/A       |
| Pelargonidin-3-O-sophoroside-5-O-(malonyl)-glucoside              | N/A             | N/A             | N/A             | N/A                          | N/A                          | N/A                          | N/A       | N/A       | N/A       |
| Pelargonidin-3-O-rutinoside-5-O-glucoside                         | N/A             | N/A             | N/A             | N/A                          | N/A                          | N/A                          | N/A       | N/A       | N/A       |

|                                                                         |                            |                            |                  |                              |                              |                              |            |            |            |
|-------------------------------------------------------------------------|----------------------------|----------------------------|------------------|------------------------------|------------------------------|------------------------------|------------|------------|------------|
| Pelargonidin-3-O-sophoroside                                            | N/A                        | N/A                        | N/A              | N/A                          | N/A                          | N/A                          | N/A        | N/A        | N/A        |
| Pelargonidin-3-O-[6-O-feruloyl-2-O-glucosyl-glucoside]-5-O-glucoside    | N/A                        | N/A                        | N/A              | N/A                          | N/A                          | N/A                          | N/A        | N/A        | N/A        |
| Pelargonidin-3-O-(6-O-malonyl-beta-D-glucoside)                         | N/A                        | N/A                        | N/A              | N/A                          | N/A                          | N/A                          | N/A        | N/A        | N/A        |
| Pelargonidin-3-(6"-caffeylsophoroside)-5-glucoside                      | N/A                        | N/A                        | N/A              | N/A                          | N/A                          | N/A                          | N/A        | N/A        | N/A        |
| Pelargonidin-3-sophoroside-5-glucoside                                  | N/A                        | N/A                        | N/A              | N/A                          | N/A                          | N/A                          | N/A        | N/A        | N/A        |
| Pelargonidin-3-O-5-O-(6-O-coumaroyl)-diglucoside                        | N/A                        | N/A                        | N/A              | N/A                          | N/A                          | N/A                          | N/A        | N/A        | N/A        |
| Pelargonidin-3-O-(6-O-p-coumaroyl)-glucoside                            | N/A                        | N/A                        | N/A              | 0.085615<br>2363<br>0.071312 | 0.089855<br>3739<br>0.074054 | 0.097483<br>3895<br>0.070238 | 0.01460016 | 0.01454144 | 0.0188695  |
| Pelargonidin-3-O-galactoside                                            | N/A<br>0.069053            | N/A<br>0.060897            | N/A<br>0.059046  | N/A<br>9219                  | N/A<br>4824                  | N/A<br>806                   | N/A        | N/A        | N/A        |
| Pelargonidin                                                            | 0303                       | 7882                       | 3359             | N/A                          | N/A                          | N/A                          | N/A        | N/A        | N/A        |
| Pelargonidin-3-O-glucoside                                              | 0.061645<br>6612           | 0.063786<br>193            | 0.066311<br>5347 | N/A                          | N/A                          | N/A                          | 0.0236444  | 0.01987832 | 0.0224042  |
| Pelargonidin-3-O-rutinoside                                             | 0.462558<br>54<br>3.493491 | 0.469165<br>55<br>3.255995 | 0.536845<br>219  | N/A                          | N/A                          | N/A                          | 0.1680384  | 0.1833262  | 0.182968   |
| Pelargonidin-3-O-sambubioside                                           | 74                         | 31                         | 3.265442         | N/A                          | N/A                          | N/A                          | 0.999726   | 1.036088   | 1.00904    |
| Pelargonidin-3-O-[2-O-glucosyl-6-O-p-coumaroyl-glucoside]-5-O-glucoside | N/A                        | N/A                        | N/A              | N/A                          | N/A                          | N/A                          | N/A        | N/A        | N/A        |
| Pelargonidin-3-O-arabinside                                             | N/A                        | N/A                        | N/A              | N/A                          | N/A                          | N/A                          | N/A        | N/A        | N/A        |
| Pelargonidin-3,5-O-diglucoside                                          | 0.024012<br>1901           | 0.022817<br>1247           | 0.022325<br>7969 | 0.573437<br>801              | 0.634190<br>193              | 0.584597<br>978              | 0.1197752  | 0.1395326  | 0.1194548  |
| Peonidin                                                                | N/A                        | N/A                        | N/A              | N/A                          | N/A                          | N/A                          | N/A        | N/A        | N/A        |
| Peonidin-3-O-galactoside                                                | N/A                        | N/A                        | N/A              | N/A                          | N/A                          | N/A                          | N/A        | N/A        | N/A        |
| Peonidin-3-O-sambubioside                                               | N/A                        | N/A                        | N/A              | N/A                          | N/A                          | N/A                          | N/A        | N/A        | N/A        |
| Peonidin-3-O-sophoroside                                                | N/A                        | N/A                        | N/A              | N/A                          | N/A                          | N/A                          | N/A        | N/A        | N/A        |
| Peonidin-3-O-sambubioside-5-O-glucoside                                 | N/A                        | N/A                        | N/A              | N/A                          | N/A                          | N/A                          | N/A        | N/A        | N/A        |
| Peonidin-3-O-(6"-ferulylsophoroside)-5-glucoside                        | N/A                        | N/A                        | N/A              | N/A                          | N/A                          | N/A                          | N/A        | N/A        | N/A        |
| Peonidin-3-O-P-hydroxybenzoylsophoroside-5-glucoside                    | N/A<br>0.046369            | N/A<br>0.044280            | N/A<br>0.042611  | N/A                          | N/A                          | N/A                          | N/A        | N/A        | N/A        |
| Peonidin-3-O-arabinside                                                 | 8347                       | 496                        | 5675             | N/A                          | N/A                          | N/A                          | 0.01573594 | 0.01470546 | 0.01730138 |
| Peonidin-3-(caffeoyl-glucosyl-glucoside)-5-glucoside                    | N/A                        | N/A                        | N/A              | N/A                          | N/A                          | N/A                          | N/A        | N/A        | N/A        |
| Peonidin-3-sophoroside-5-glucoside                                      | N/A                        | N/A                        | N/A              | N/A                          | N/A                          | N/A                          | N/A        | N/A        | N/A        |
| Peonidin-3-O-5-O-(6-O-coumaroyl)-diglucoside                            | N/A<br>12.95764            | N/A<br>12.31236            | N/A<br>11.92622  | N/A<br>3.271350              | N/A<br>3.515309              | N/A<br>3.184463              | N/A        | N/A        | N/A        |
| Peonidin-3,5-O-diglucoside                                              | 46                         | 6                          | 41               | 05                           | 56                           | 17                           | 4.16726    | 4.03852    | 4.4433     |

|                                                        |                 |                 |                 |                  |                  |                  |           |           |           |
|--------------------------------------------------------|-----------------|-----------------|-----------------|------------------|------------------|------------------|-----------|-----------|-----------|
| Peonidin-3-O-(6-O-malonyl-beta-D-glucoside)            | 0.697134<br>986 | 0.613575<br>737 | 0.640246<br>467 | N/A              | N/A              | N/A              | 0.193178  | 0.1762696 | 0.1951608 |
| Peonidin-3-O-glucoside                                 | 22.29304<br>41  | 21.17811<br>66  | 20.66953<br>66  | 0.016193<br>0569 | 0.019748<br>0436 | 0.012698<br>026  | 7.04866   | 6.98522   | 7.10364   |
| Peonidin-3-O-rutinoside                                | 742.9407<br>71  | 733.1065<br>68  | 716.0236<br>61  | N/A              | N/A              | N/A              | 276.914   | 276.194   | 271.598   |
| Peonidin-3-O-caffeoyl-feruloyl-sophoroside-5-glucoside | N/A             | N/A             | N/A             | N/A              | N/A              | N/A              | N/A       | N/A       | N/A       |
| Peonidin-3-O-(6-O-p-coumaroyl)-glucoside               | 14.84793<br>39  | 13.20365<br>28  | 13.96253<br>7   | N/A              | N/A              | N/A              | 4.10212   | 3.95878   | 4.0869    |
| Petunidin-3-O-galactoside                              | 17.94159<br>78  | 17.29688<br>34  | 17.09188<br>3   | N/A              | N/A              | N/A              | 7.30028   | 7.33514   | 7.391     |
| Petunidin-3-O-(6-O-malonyl-beta-D-glucoside)           | N/A             | N/A             | N/A             | N/A              | N/A              | N/A              | N/A       | N/A       | N/A       |
| Petunidin-3-O-(6-O-p-coumaroyl)-glucoside              | N/A             | N/A             | N/A             | N/A              | N/A              | N/A              | N/A       | N/A       | N/A       |
| Petunidin-3-O-5-O-(6-O-coumaroyl)-diglucoside          | N/A             | N/A             | N/A             | N/A              | N/A              | N/A              | N/A       | N/A       | N/A       |
| Petunidin-3,5-O-diglucoside                            | N/A             | N/A             | N/A             | N/A              | N/A              | N/A              | N/A       | N/A       | N/A       |
| Petunidin-3-O-glucoside                                | 3.832851<br>24  | 3.547184<br>99  | 3.448800<br>53  | N/A              | N/A              | N/A              | 1.490794  | 1.46163   | 1.465778  |
| Petunidin-3-O-rutinoside                               | N/A             | N/A             | N/A             | N/A              | N/A              | N/A              | N/A       | N/A       | N/A       |
| Petunidin-3-O-arabinoside                              | N/A             | N/A             | N/A             | N/A              | N/A              | N/A              | N/A       | N/A       | N/A       |
| Petunidin-3-O-sambubioside-5-O-glucoside               | N/A             | N/A             | N/A             | N/A              | N/A              | N/A              | N/A       | N/A       | N/A       |
| Petunidin-3-O-sophoroside                              | N/A             | N/A             | N/A             | N/A              | N/A              | N/A              | N/A       | N/A       | N/A       |
| Petunidin-3-O-sambubioside                             | N/A             | N/A             | N/A             | N/A              | N/A              | N/A              | N/A       | N/A       | N/A       |
| Procyanidin A1                                         | N/A             | N/A             | N/A             | N/A              | N/A              | N/A              | N/A       | N/A       | N/A       |
| Procyanidin C1                                         | N/A             | N/A             | N/A             | N/A              | N/A              | N/A              | N/A       | N/A       | N/A       |
| Procyanidin B2                                         | 7.003236<br>91  | 6.554658<br>18  | 5.932960<br>89  | 0.412455<br>159  | 0.523377<br>91   | 0.432834<br>377  | 2.15686   | 2.15752   | 2.1697    |
| Procyanidin A2                                         | N/A             | N/A             | N/A             | N/A              | N/A              | N/A              | N/A       | N/A       | N/A       |
| Procyanidin B1                                         | 0.242774<br>105 | 0.214054<br>96  | 0.205907<br>986 | 0.012977<br>9653 | 0.013630<br>8569 | 0.013318<br>9697 | 0.070074  | 0.0625666 | 0.0638172 |
| Procyanidin B3                                         | 0.482193<br>526 | 0.418374<br>665 | 0.392323<br>365 | N/A              | N/A              | N/A              | 0.1193534 | 0.119143  | 0.1171456 |
| Quercetin-3-O-glucoside                                | 380.5199<br>72  | 353.1534<br>85  | 356.2339<br>8   | 37.08577<br>63   | 40.71688<br>95   | 38.06124<br>22   | 124.8536  | 128.1436  | 120.2656  |
| Naringenin-7-O-glucoside                               | 2.920929<br>75  | 2.471347<br>18  | 2.486894<br>51  | 4.709204<br>44   | 5.201238<br>24   | 5.107510<br>83   | 1.917552  | 1.96913   | 2.0575    |
| Kaempferol-3-O-rutinoside                              | 7.573002<br>75  | 7.123894<br>1   | 6.353927<br>05  | 14.08254<br>58   | 14.88291<br>23   | 15.02315<br>84   | 4.85352   | 5.06272   | 3.95564   |
| Rutin                                                  | 694.9896<br>69  | 696.1930<br>29  | 640.7295<br>43  | 45.35067<br>5    | 50.33283<br>8    | 45.71511<br>8    | 226.258   | 222.38    | 193.0028  |

---

|                   |                 |                 |                 |                 |                 |                 |           |           |           |
|-------------------|-----------------|-----------------|-----------------|-----------------|-----------------|-----------------|-----------|-----------|-----------|
| Dihydromyricetin  | 3.643216<br>25  | 3.218485<br>25  | 3.008024<br>98  | 8.284667<br>31  | 9.087667<br>16  | 8.849975<br>93  | 2.37136   | 2.2158    | 2.34328   |
| Naringenin        | 0.231950<br>069 | 0.234326<br>408 | 0.207505<br>751 | 0.151839<br>923 | 0.125270<br>431 | 0.114402<br>022 | 0.0804574 | 0.0822724 | 0.1039818 |
| Dihydrokaempferol | 1.622134<br>99  | 1.484437        | 1.459369<br>04  | 18.69296<br>05  | 19.96483<br>41  | 19.50346<br>65  | 4.65926   | 4.6226    | 4.6365    |
| Afzelin           | 1.650688<br>71  | 1.611876<br>68  | 1.697032<br>53  | 3.105641<br>27  | 3.313001<br>49  | 2.901839<br>19  | 1.132984  | 1.119402  | 1.127362  |
| Chalcone          | N/A             | N/A             | N/A             | N/A             | N/A             | N/A             | N/A       | N/A       | N/A       |

---
